# Supplementary material
Source: Springer Nature journal article supplement (https://www.springermedizin.de/resource/supplementary/13024_2009_86_MOESM4_ESM.pdf/9643362)

**a**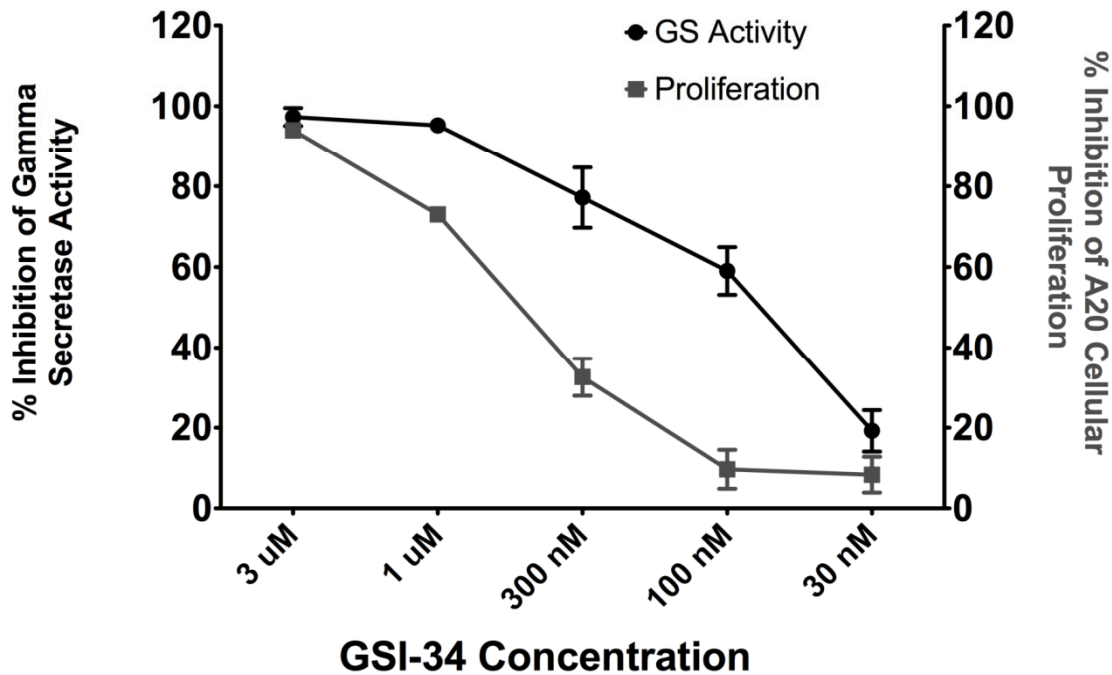**b**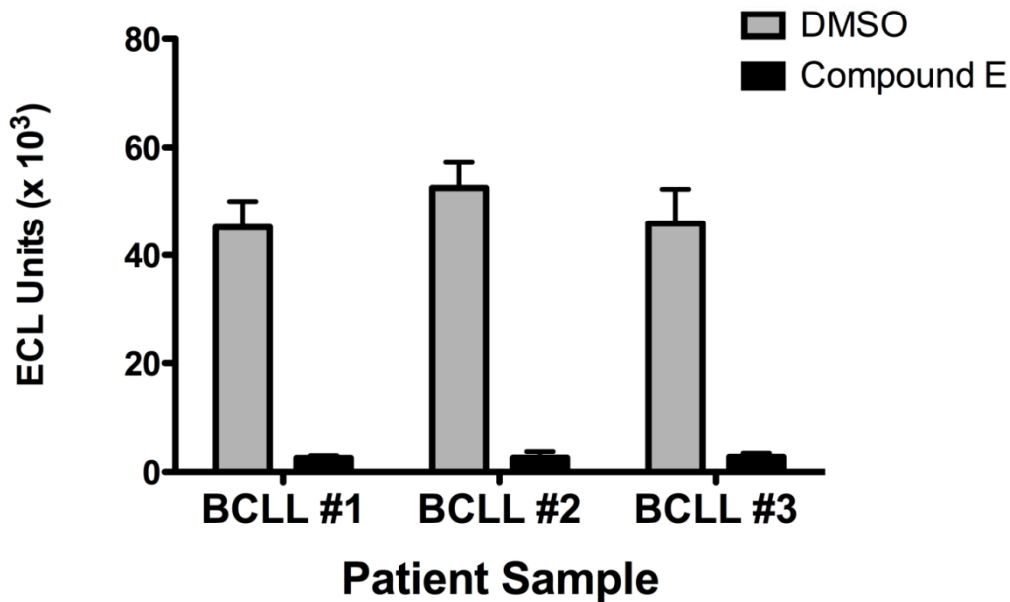

Supplement: MOESM4 [file 9643362]
